# Supplementary material for: Bidirectional optical response hydrogel with adjustable human comfort temperature for smart windows
Source: Royal Society of Chemistry journal article supplement (doi:10.1039/d3mh01376f), 2023-10-27
Supplement: d3mh01376f1.pdf [file d3mh01376f1.pdf]

## Support information for

### **Bidirectional optical response hydrogel with adjustable human comfort temperature for smart windows**

Zhenkun Yu, Yulin Ma, Linhan Mao, Yue Lian, Yanwen Xiao, Zhaoxia Chen\*, Yuhong Zhang\*  
Hubei Collaborative Innovation Center for Advanced Organic Chemical Materials, Hubei Provincial Engineering Center of Performance Chemicals, College of Chemistry and Chemical Engineering, Hubei University, Wuhan 430062, China

E-mail address: [chenzhaoxia@hubu.edu.cn](mailto:chenzhaoxia@hubu.edu.cn) (Z. X. Chen); [zhangyuhong@hubu.edu.cn](mailto:zhangyuhong@hubu.edu.cn) (Y.H. Zhang).

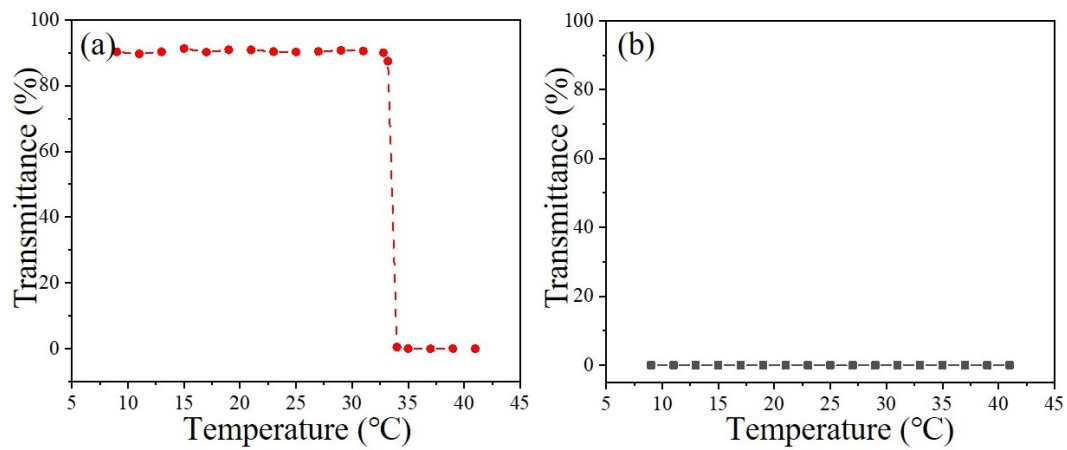

Fig. S1 The effects of temperature on the transmittance of (a) PNIPAM and (b) SDS/PTH micelles at 550 nm.

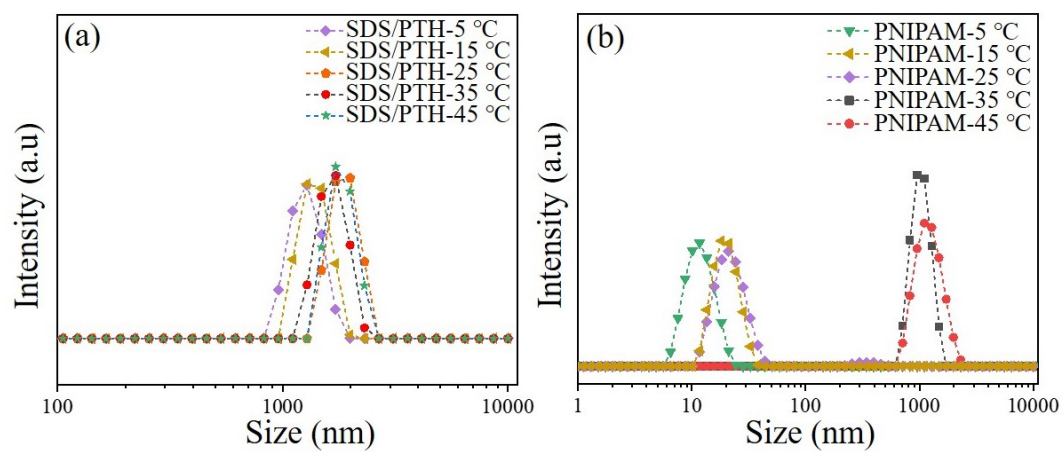

Fig. S2 The particle size distribution of (a) SDS/PTH micelles and (b) PNIPAM at different temperatures.

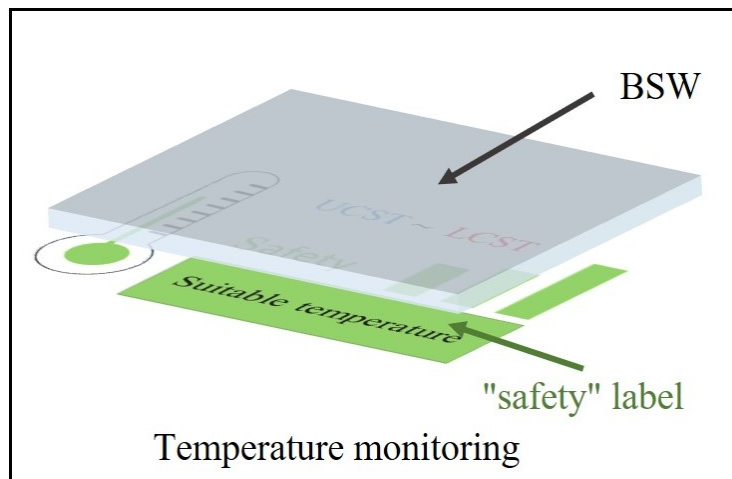

Fig. S3 Schematic diagram of the smart temperature monitoring device based on BSW.

Table S1 Summary of composite hydrogels BSW under different conditions.

| Runs | SDS<br>(g) | PTH<br>(g) | AlCl <sub>3</sub> ·6H <sub>2</sub> O<br>(g) | NIPAM<br>(g) | APS<br>(g) | TEMEDA<br>(μL) | DI water<br>(mL) |
|------|------------|------------|---------------------------------------------|--------------|------------|----------------|------------------|
| 1    | 0.6        | 1.125      | 2.25                                        | 0.75         | 0.08       | 20             | 60               |
| 2    | 0.6        | 1.5        | 2.25                                        | 0.75         | 0.08       | 20             | 60               |
| 3    | 0.6        | 2.25       | 2.25                                        | 0.75         | 0.08       | 20             | 60               |
| 4    | 0.6        | 3.0        | 2.25                                        | 0.75         | 0.08       | 20             | 60               |
| 5    | 0.6        | 3.75       | 2.25                                        | 0.75         | 0.08       | 20             | 60               |
| 6    | 0.6        | 4.5        | 2.25                                        | 0.75         | 0.08       | 20             | 60               |
| 7    | 1.2        | 1.5        | 2.25                                        | 0.75         | 0.08       | 20             | 60               |
| 8    | 1.8        | 1.5        | 2.25                                        | 0.75         | 0.08       | 20             | 60               |
| 9    | 2.4        | 1.5        | 2.25                                        | 0.75         | 0.08       | 20             | 60               |
| 10   | 3.0        | 1.5        | 2.25                                        | 0.75         | 0.08       | 20             | 60               |
| 11   | 3.6        | 1.5        | 2.25                                        | 0.75         | 0.08       | 20             | 60               |
| 12   | 4.2        | 1.5        | 2.25                                        | 0.75         | 0.08       | 20             | 60               |

Table S2 Performance Comparison of BSW and Other Thermochromic Smart Window Materials

| Materials                                                         | Bidirectional optical response | UCST (°C)        | LCST (°C)      | T <sub>lum</sub> (%) | Δ T <sub>lum</sub> (%) | Δ T <sub>sol</sub> (%) | Irradiation times | Temperature amplification (°C) | Ref.            |
|-------------------------------------------------------------------|--------------------------------|------------------|----------------|----------------------|------------------------|------------------------|-------------------|--------------------------------|-----------------|
| PNIPAM/ ethanol                                                   | No                             | /                | 28-32          | 89.83                | 88.45                  | 71.81                  | 500 s             | 14.5                           | 1               |
| PNIPAM                                                            | No                             | /                | 30             | 55                   | 54                     | 58                     | 40 min            | 14                             | 2               |
| PNIPAM/HPMC                                                       | No                             | /                | 32             | 90.82                | 90.72                  | 81.52                  | 300 s             | 16.3                           | 3               |
| pNIPAm/AgNW                                                       | No                             | /                | 31             | 78.3                 | 70                     | 58.4                   | 40 min            | 6                              | 4               |
| pNIPAm/AEMA                                                       | No                             | /                | 32             | 87.2                 | /                      | 81.3                   | 30 min            | 4.9                            | 5               |
| VO <sub>2</sub> /TTWF                                             | No                             | /                | 47.6           | 50.5                 | /                      | 3.4                    | 45 min            | 33.9                           | 6               |
| VO <sub>2</sub> /WO <sub>3</sub>                                  | No                             | /                | 61.5           | 30.1                 | /                      | 10.2                   | /                 | /                              | 7               |
| VO <sub>2</sub> /ZnO                                              | No                             | /                | /              | 55.71                | /                      | 17.8                   | /                 | /                              | 8               |
| HPC/PAM                                                           | No                             | /                | 43.2           | /                    | 86                     | 80.5                   | 60 min            | 10                             | 9               |
| HPC/PVA                                                           | No                             | /                | 50             | 91.3                 | 21.8                   | 19.4                   | /                 | /                              | 10              |
| Hydrogel                                                          | No                             | 20-50            | /              | 99.05                | /                      | 33.42                  | 60 min            | 6.1                            | 11              |
| TRSWs                                                             | Yes                            | 8-75             | /              | 92                   | 42 and 62              | 12.07                  | /                 | /                              | 12              |
| PVA-<br>PNIPAM/Li <sub>m</sub> Cs <sub>n</sub><br>WO <sub>3</sub> | Yes                            | -10              | 32             | 67.48                | 50.72                  | /                      | 700 s             | 40                             | 13              |
| <b>BSW</b>                                                        | <b>Yes</b>                     | <b>9.5 -25.5</b> | <b>25.5-50</b> | <b>91.31</b>         | <b>90.95 and 91.21</b> | <b>76.34 and 76.75</b> | <b>200 s</b>      | <b>23.2</b>                    | <b>Our work</b> |

**Note:** ‘/’ means not mentioned.

## References

1. Y. Ding, Y. Duan, F. Yang, Y. Xiong and S. Guo, *Chem. Eng. J.*, 2023, **460**, 141572.
2. Z. Zhang, S. Tan, Z. Bao, Y. Wu and C. Wang, *Macromol. Mater. Eng.*, 2023, **308**(5), 2200566.
3. K. Wang, G. Chen, S. Weng, L. Hou, D. Ye and X. Jiang, *ACS Appl. Mater. Interfaces*, 2023, **15**(3), 4385.
4. C. Lin, J. Hur, C. Y. H. Chao, G. Liu, S. Yao, W. Li and B. Huang, *Sci. Adv.*, 2022, **8**(17), eabn7359.
5. X. H. Li, C. Liu, S. P. Feng and N. X. Fang, *Joule*, 2019, **3**(1), 290.
6. S. Liu, C. Y. Tso, H. H. Lee, Y. W. Du, K. M. Yu, S. P. Feng and B. Huang, *ACS Appl. Mater. Interfaces*, 2021, **13**(19), 22495.
7. J. Zheng, S. Bao and P. Jin, *Nano Energy*, 2015, **11**, 136.
8. Z. Fang, S. Tian, B. Li, Q. Liu, B. Liu, X. Zhao and G. S, *Appl. Surf. Sci.*, 2021, **540**, 148414.
9. A. Nakamura, R. Ogai and K. Murakami, *Sol. Energ. Mat. Sol. C.*, 2021, **232**, 111348.
10. Y. Feng, M. Yang, Y. Zhang, H. Ju, G. Zhang, W. Ma, Y. Wu, Y. Yu, Y. Yang, D. Liu and H. Liu, *J. Chem. Sci.*, 2022, **134**(1), 24.
11. G. Xu, H. Xia, P. Chen, W. She, H. Zhang, J. Ma, Q. Ruan, W. Zhang and Z. Sun, *Adv. Funct. Mater.*, 2022, **32**(5), 2109597.
12. J. Li, X. Lu, Y. Zhang, X. Wen, K. Yao, F. Cheng, D. Wang, X. Ke, H. Zeng and S. Yang, *Small*, 2022, **18**(28), 2201322.
13. H. Zhang, J. Liu, F. Shi, T. Li, H. Zhang, D. Yang, Y. Li, Z. Tian and N. Zhou, *Chem. Eng. J.*, 2022, **431**, 133353.
